# Supplementary material for: Synthesis of a novel chiral DA-TD covalent organic framework for open-tubular capillary electrochromatography enantioseparation
Source: Royal Society of Chemistry journal article supplement (doi:10.1039/d1cc06420g), 2021-12-02
Supplement: d1cc06420g1.pdf [file d1cc06420g1.pdf]

### Supporting Information

Synthesis of novel chiral DA-TD covalent organic framework for open-tubular  
capillary electrochromatography enantioseparation

Guoxiu Wang<sup>a,b</sup>, Wenjuan Lv<sup>\*\* a,b</sup>, Congjie Pan<sup>a,b</sup>, Hongli Chen<sup>a,b</sup>, Xingguo Chen<sup>\*  
a,b,c</sup>

<sup>a</sup> *State Key Laboratory of Applied Organic Chemistry, College of Chemistry and  
Chemical Engineering, Lanzhou University, Lanzhou, Gansu 730000, China*

<sup>b</sup> *Department of Chemistry, Lanzhou University, Lanzhou 730000, China*

<sup>c</sup> *Key Laboratory of Nonferrous Metal Chemistry and Resources Utilization of  
Gansu Province, Lanzhou University, Lanzhou, Gansu 730000, China*

\* Corresponding author. State Key Laboratory of Applied Organic Chemistry and  
Department of Chemistry, Lanzhou University, Lanzhou 730000, China.

\*\* Corresponding author. Department of Chemistry, Lanzhou University, Lanzhou,  
China.

E-mail addresses: chenxg@lzu.edu.cn (X. Chen), lvwenj@lzu.edu.cn (W. Lv).

Tel: 86-931-8912763

Fax: 86-931-8912582

## 1. Chemicals and materials

1,4-dimethoxybenzene, dimethyl sulfoxide, dioxane, hexamethylenetetramine, N,N-dimethylformamide (DMF), tetrahydrofuran (THF), (*S*)-(-)-2-methyl-1-butanol and 4-(4,4,5,5-tetramethyl-1,3,2-dioxaborolan-2-yl)aniline were purchased from Energy Chemical (Shanghai, China). Tetrakis(triphenylphosphine)palladium, K<sub>2</sub>CO<sub>3</sub>, *p*-toluenesulfonyl chloride, formaldehyde solution (37 wt. % in water) and 2,4,6-tribromophenol were purchased from Aladdin (Shanghai, China). Paraformaldehyde, dimethyl sulfoxide (DMSO), ethyl acetate (EtOAc), dichloromethane (DCM), N,N-dimethylacetamide (DMA), ether, pyridine and sodium bicarbonate (NaHCO<sub>3</sub>) were obtained from Chron Chemicals Co., Ltd. (Sichuan, China). Isoprenaline and synephrine were bought from J&K Scientific Ltd. (Beijing, China). Terbutaline and epinephrine were purchased from National Institutes for Food and Drug Control (Beijing, China). (±)-Verapamil hydrochloride, carvedilol and norepinephrine were commercially available from Adamas-Beta Co., Ltd. (Shanghai, China). Fused silica capillary (375 μm o.d. × 75 μm i.d.) was purchased from Yongnian Photoconductive Fiber Factory (Hebei, China). Ultrapure water was used throughout the whole experimental procedure.

## 2. Apparatus and Characterization

Scanning electron microscopy (SEM) images of the capillary were recorded on a JSM-5600LV emission scanning electron microscope (JEOL, Japan). Powder X-ray diffraction (XRD) patterns were recorded on a D/max 82400 X-ray powder diffractometer (Rigaku, Japan) with Cu K $\alpha$  radiation. Fourier-transform infrared

spectra were collected on a Nicolet Nexus 670 Fourier transform infrared spectrometer (FT-IR, America) with KBr pellets. CD spectra were recorded on a J-800 spectropolarimeter (Jasco, Japan). Thermogravimetric analysis (TGA) was carried out in an N<sub>2</sub> atmosphere with a heating rate of 10 °C/min performed on a STA449C integration thermal analyzer. The N<sub>2</sub> adsorption and desorption isotherms were obtained at 77 K with a micromeritics ASAP 2020M system. Surface areas were calculated using Langmuir and Brunauer-Emmett-Teller (BET) methods. The pore-size-distribution curves were calculated from nitrogen adsorption isotherms using non-local density functional theory (NLDFT).

### 3. Experimental procedures

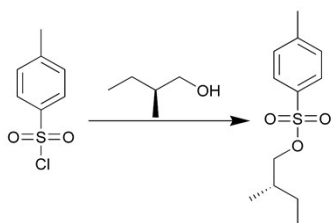

*(S)*-(-)-2-methylbutyl-4-methylbenzenesulfonate was prepared according to the literature with minor modifications.<sup>1</sup> *p*-toluenesulfonyl chloride (10.8 g, 56.7 mmol), pyridine (20 mL) and *(S)*-(-)-2-methyl-1-butanol (5.00 g, 56.7 mmol) were added into a 50 mL flask at 0 °C. The reaction mixture was stirred overnight at room temperature. The mixture was poured into saturated NaHCO<sub>3</sub> (30 mL). Then, the organic phase was separated and aqueous phase was extracted with dichloromethane (10 mL × 3). The combined organic layers were dried over Na<sub>2</sub>SO<sub>4</sub>, filtered, concentrated by rotary evaporation. The crude was purified by column chromatography with hexanes/ether (10 : 1) as eluent to afford 11.2 g (82 %) of *(S)*-(-)-2-methylbutyl-4-

methylbenzenesulfonate.  $^1\text{H NMR}$  (400 MHz,  $\text{CDCl}_3$ ):  $\delta$  7.79 (m, 2H), 7.34 (m, 2H), 3.88(dd, 1H), 3.82 (dd, 1H), 2.45 (s, 3H), 1.57 (m, 1H), 1.38 (m, 1H), 1.16 (m, 1H), 0.88 (d, 3H), 0.83 (t, 3H). ESI-MS: Calcd for  $[\text{M}+\text{Na}]^+$  265.0869, found 265.0867.

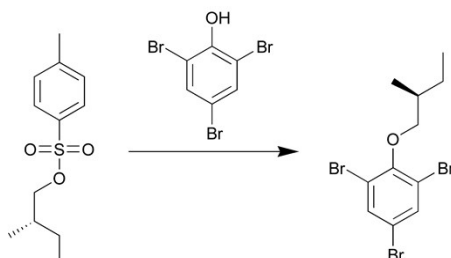

(S)-1,3,5-tribromo-2-(2-methyl-butoxy)benzene was prepared according to the previous literature.<sup>2</sup> To a 50 mL flask, 2,4,6-tribromophenol (3.31 g, 10.0 mmol),  $\text{K}_2\text{CO}_3$  (3.32 g, 24.0 mmol), THF (10 mL), DMF (10 mL) and (S)-(-)-2-methylbutyl-4-methylbenzenesulfonate (4.85 g, 20.0 mmol) were added under  $\text{N}_2$  protection. Then, the resulting mixture was stirred at 70 °C for 24 h. The mixture was extracted with chloroform and the combined organic layers were washed with water. The combined organic layer was dried over  $\text{Na}_2\text{SO}_4$  and concentrated by rotary evaporation. The crude purified by column chromatography with hexanes/ether (10 : 1) as eluent to afford 3.10 g (62%) of the (S)-1,3,5-tribromo-2-(2-methyl-butoxy)benzene.  $^1\text{H NMR}$  (400 MHz,  $\text{CDCl}_3$ ):  $\delta$  7.62 (s, 2H), 3.83 (m, 1H), 3.75 (m, 1H), 1.94 (m, 1H), 1.64 (m, 1H), 1.30 (m, 1H), 1.08 (d, 3H), 0.96 (t, 3H). ESI-MS: Calcd for  $[\text{M}+\text{Na}]^+$  400.8569, found 400.8575

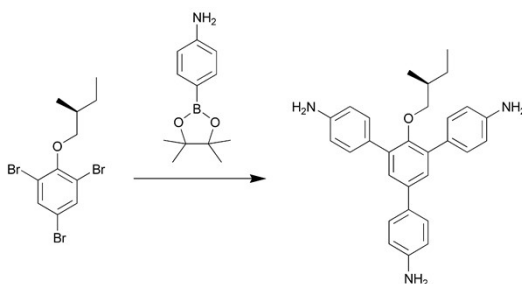

(S)-1,3,5-tribromo-2-(2-methyl-butoxy)benzene (0.802 g, 2.00 mmol) and 4-(4,4,5,5-tetramethyl-1,3,2-dioxaborolan-2-yl)aniline (1.31 g, 5.50 mmol) were dissolved in 15 mL DMF. Aqueous solution of  $K_2CO_3$  (5 mL, 6 M) was added into the mixture under nitrogen atmosphere. After the addition of tetrakis(triphenylphosphine) palladium (50.0 mg), the mixture was refluxed for 48 h at 80 °C. Upon cooling down, the mixture was extracted with  $3 \times 100$  mL EtOAc. The obtained organic layer was collected and dried over  $Na_2SO_4$ . After that, the solvent was removed at reduced pressure. The crude purified by column chromatography with ether/EtOAc (1:1) as eluent to give (S)-1,3,5-tri(4-aminophenyl)-2-(2-methyl-butoxy)benzene (i.e. TD) as a yellow solid in 59% yield.  $^1H$  NMR (400 MHz,  $CDCl_3$ ):  $\delta$  7.43 (m, 8H), 6.73 (m, 6H), 3.11 (dd, 1H), 3.01 (dd, 1H), 1.25 (m, 1H), 1.07 (m, 1H), 0.83 (m, 1H), 0.58 (d, 3H), 0.54 (t, 3H). ESI-MS: Calcd for  $[M+Na]^+$  438.2540, found 438.2535.

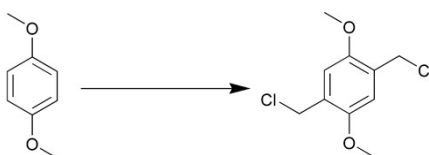

1,4-bis(chloromethyl)-2,5-dimethoxybenzene was prepared according to the previous literature.<sup>3</sup> 1,4-dimethoxybenzene (10.0 g, 72.3 mmol) and paraformaldehyde (3.00 g, 99.0 mmol) were dispersed in a mixture of 1,4-dioxane (30.0 mL) and formaldehyde solution (38.0% in water, 5 mL) in a flask. The resulting mixture was stirred at 90 °C and concentrated HCl ( $2 \times 5$  mL) was added during 30 min intervals. Heating was continued for 1 h and a further 30 mL of concentrated HCl was added. The resulting mixture was cooled to room temperature to afford a white

precipitate, which was collected by filtration and dried under vacuum. The crude product was recrystallized from hot acetone to give product 1,4-bis(chloromethyl)-2,5-dimethoxybenzene (5.10 g, 29.5%) as a white precipitate.  $^1\text{H}$  NMR (300 MHz,  $\text{CDCl}_3$ )  $\delta$  6.93 (s, 2H), 4.64 (s, 4H), 3.86 (s, 6H).

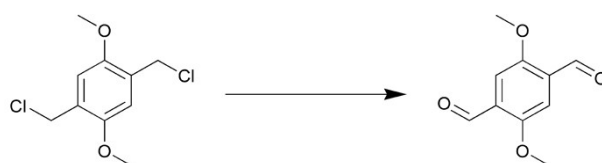

2,5-dimethoxyterephthalaldehyde was prepared according to the previous literature.<sup>3</sup> 1,4-bis(chloromethyl)-2,5-dimethoxybenzene (1.17 g, 5.00 mmol) and  $\text{NaHCO}_3$  (4.20 g, 50.0 mmol) in DMSO (50.0 mL) were stirred at reflux for 3 h. After cooling to room temperature, the pale-yellow precipitate was collected by filtration and redissolved in water (30 mL). The mixture was extracted with DCM (50 mL  $\times$  3). The organic phase was washed thrice with water (100 mL  $\times$  2) and dried over  $\text{Na}_2\text{SO}_4$ . After solvent evaporation, the residue was recrystallized from ethanol to yield compound 2,5-dimethoxyterephthalaldehyde (i.e. DA) as a bright yellow solid.  $^1\text{H}$  NMR (300 MHz,  $\text{CDCl}_3$ )  $\delta$  10.50 (s, 2H), 7.26 (s, 2H), 3.95 (s, 6H). ESI-MS: Calcd for  $[\text{M}+\text{Na}]^+$  217.0471, found 217.0469.

#### 4. Synthesis of chiral DA-TD COF

10 mL glass tube (the outer diameter is 10 mm and the inner diameter is 8 mm) was charged with TD (26.3 mg, 0.06 mmol), DA (17.5 mg, 0.09 mmol) in the presence of 9 M acetic acid (0.15 mL) using DMA (0.5 mL) and n-BuOH (1.5 mL) as solvent. The resulting mixture was sonicated for a few minutes until the solid was completely dissolved. Then, this glass tube was flash frozen at 77 K using the liquid nitrogen bath,

evacuated and flame sealed. Upon warming to room temperature, the glass tube was placed in an oven and heated at 100 °C for three days. After the reaction, the powder was filtered out, washed with DMA, water, ethanol and acetone, then further purification of the resulted chiral was carried out by Soxhlet extraction in THF for 24 h and dried under vacuum at 80 °C for 12 h to give yellow chiral DA-TD COF.

## **5. Synthesis of amorphous DA-TD**

10 mL glass tube (the outer diameter is 10 mm and the inner diameter is 8 mm) was charged with TD (26.3 mg, 0.06 mmol), DA (17.5 mg, 0.09 mmol) in the presence of 9 M acetic acid (0.15 mL) using DMA (0.5 mL) and n-BuOH (1.5 mL) as solvent anhydrous. The resulting mixture was sonicated for a few minutes until the solid was completely dissolved, and then allowed to stand at room temperature for 5 h. The obtained yellow precipitate was collected by centrifugation at 10000 rpm and washed with acetonitrile and acetone for three times, respectively. Then, the powder was dried under high vacuum at 100 °C for 8 h to give amorphous DA-TD.

## **6. Preparation of chiral DA-TD COF coated capillary and amorphous DA-TD coated capillary**

The coated capillary used in this study was fabricated by etching and chemically modifying the bare capillary. First, the bare capillary (75 µm i.d., 40.0 cm effective length and 50.2 cm total length) was sequentially rinsed with methanol for 10 min, ultrapure water for 1 h, 1 M NaOH for 2 h. Then, two ends of the capillary were sealed by rubber stopper. The capillary was heated in an oven at 100 °C for 2 h. Afterwards, the capillary, which was washed with 0.5 M HCl for 30 min, deionized water for 10 min and acetone

for 10 min, was purged with nitrogen for about 1 h at 120 °C to remove residual water and acetone. Then, the pretreated capillary was filled with GLYMO solution (5% in toluene) and then treated in an oven at 100 °C for 6 h with both ends sealed. After that, the capillary coated with GLYMO, denoted as epoxy capillary, was rinsed extensively with toluene, acetone and blown dry with nitrogen subsequently. Then, 0.5 mg/mL, 1.0 mg/mL and 2 mg/mL solution of TD-DA COF in ethanol was filled into the epoxy capillary, respectively. With both ends sealed, the capillary was placed in an oven at 70 °C for 4 h to graft DA-TD COF onto the inner wall of the capillary. Finally, the DA-TD COF treated capillary was washed with acetone and then blown dry with nitrogen. The DA-TD COF coated capillary, named as DA-TD COF capillary, was filled with deionized water, and stored until use. The pressure used for whole process of preparation the capillary was 0.07 MPa.

The amorphous DA-TD coated capillary was prepared by replaced chiral DA-TD COF with amorphous DA-TD.



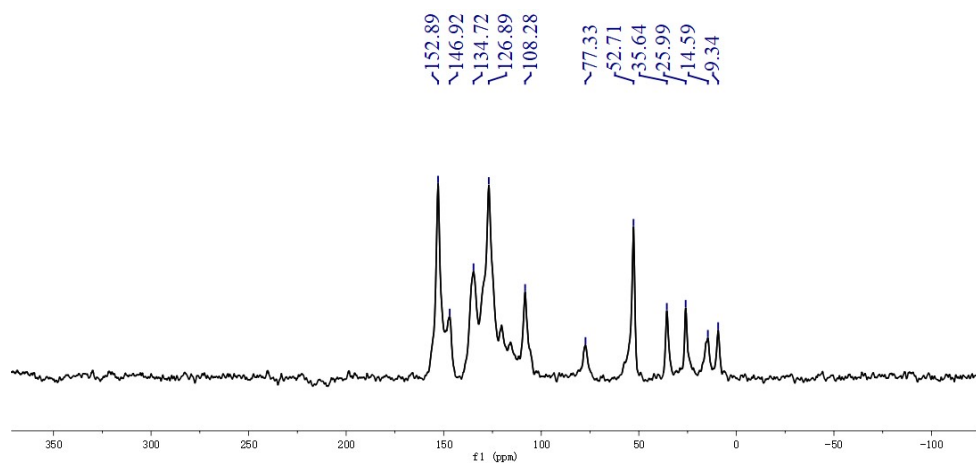

Figure S1.  $^{13}\text{C}$  NMR of chiral DA-TD COF.

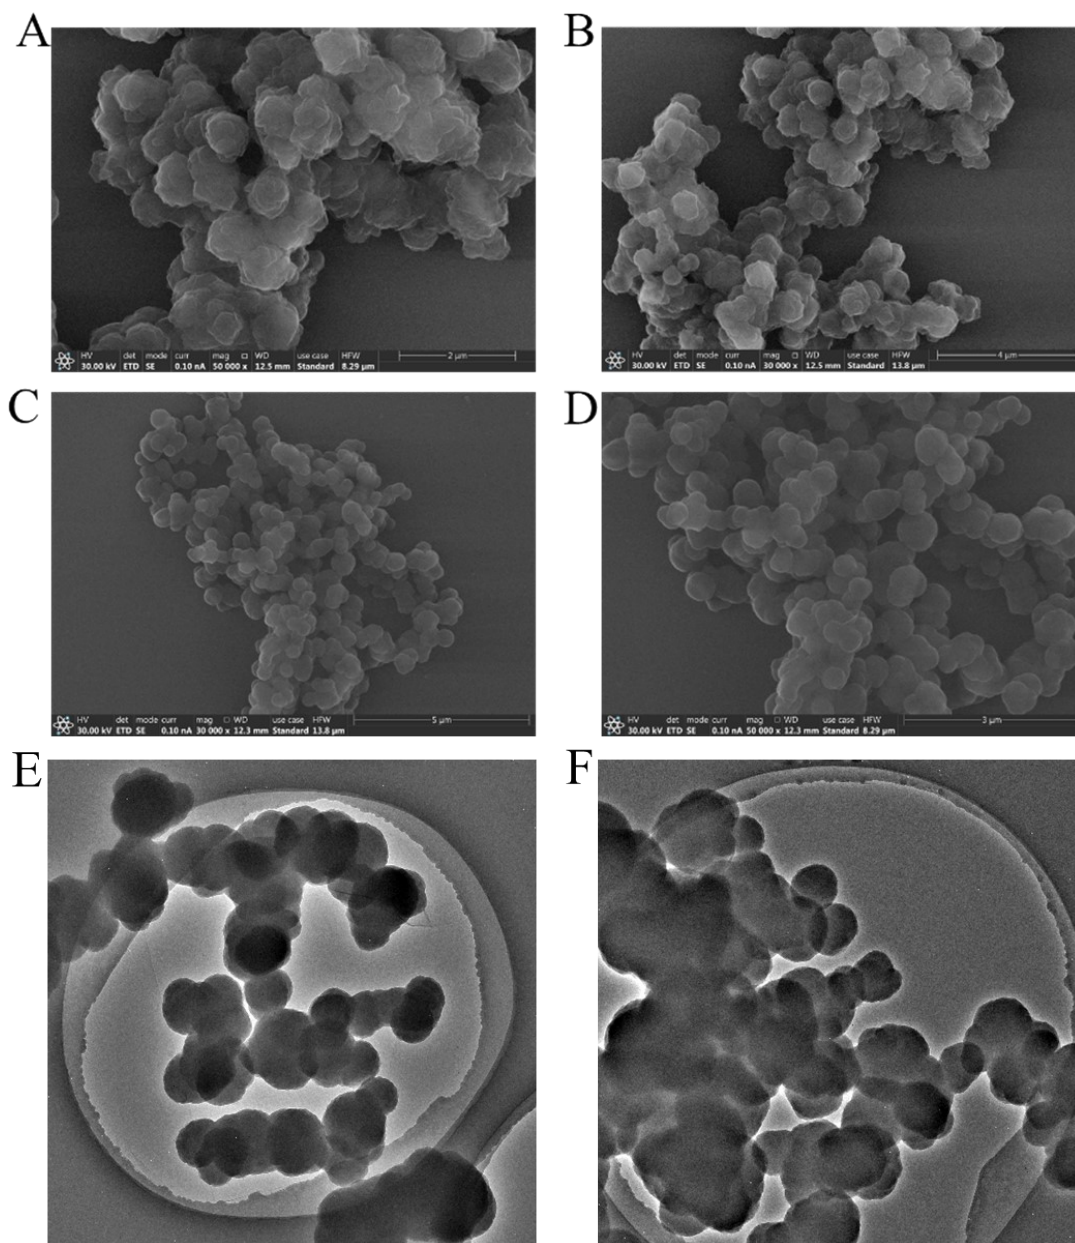

Figure S2. SEM images of DA-TD COF of 10, 000 (A) and 30, 000 magnification (B) and amorphous DA-TD of 10, 000 (C) and 30, 000 magnification (D) and TEM images of DA-TD COF (E) and amorphous DA-TD (F).

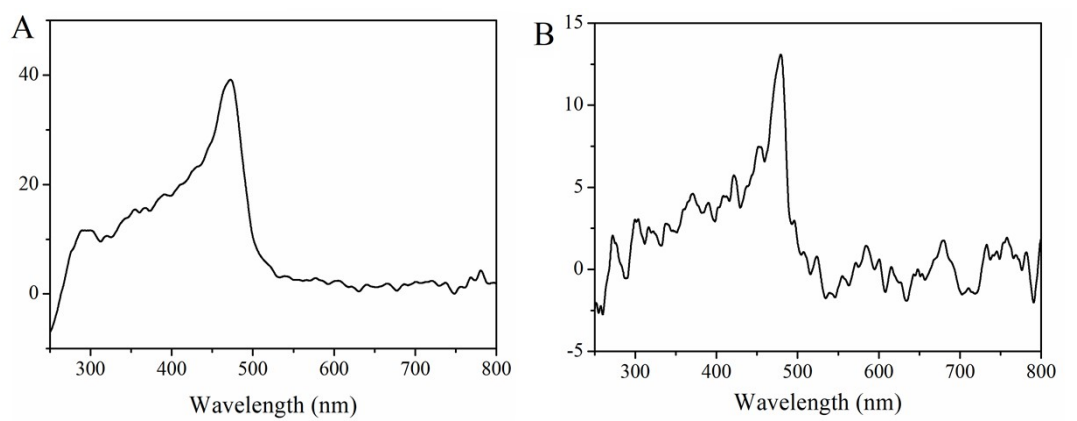

Figure S3. The solid-state CD spectrum of chiral DA-TD COF (A) and amorphous DA-TD (B).

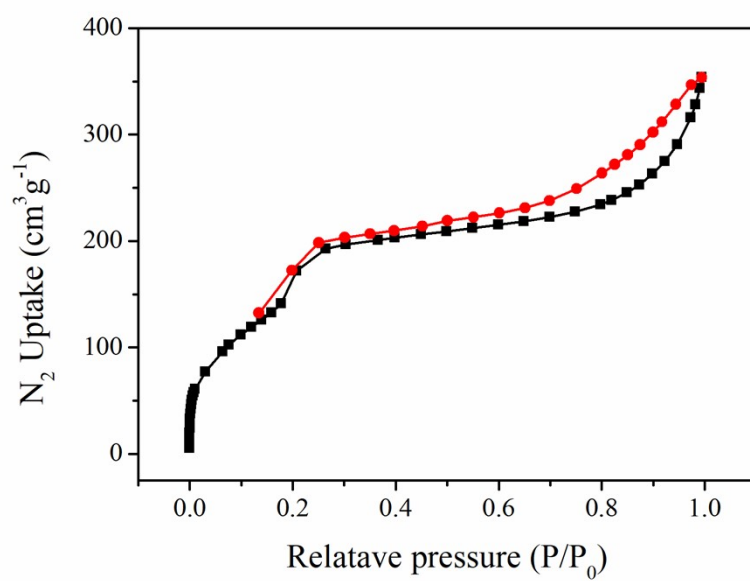

Figure S4. The N<sub>2</sub> adsorption-desorption isotherm of chiral DA-TD COF.

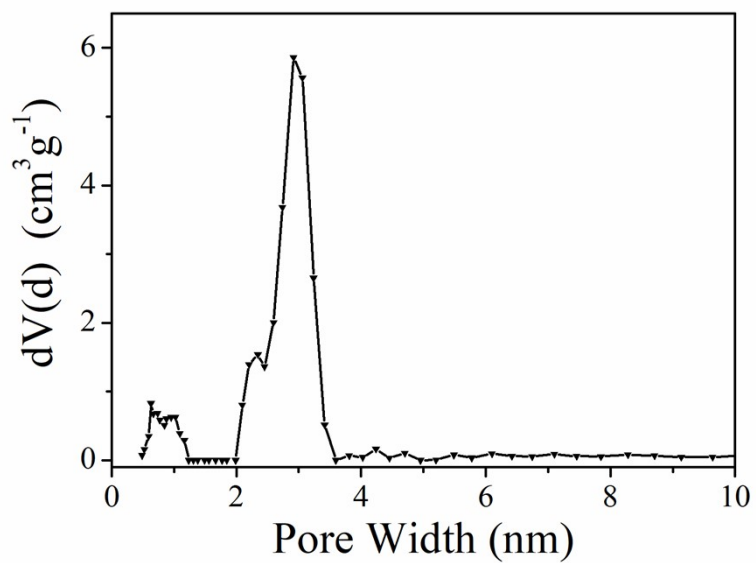

Figure S5. The pore-size distribution of chiral DA-TD COF.

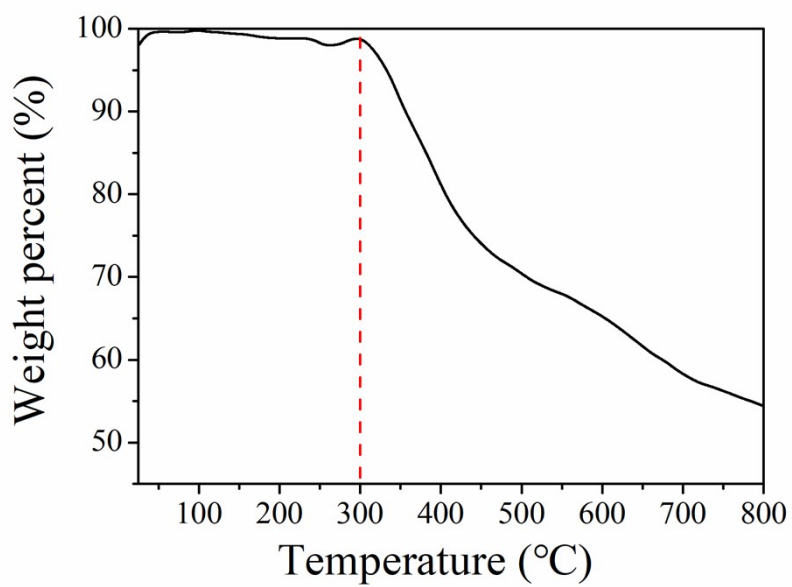

Figure S6. The TGA curve of chiral DA-TD COF.

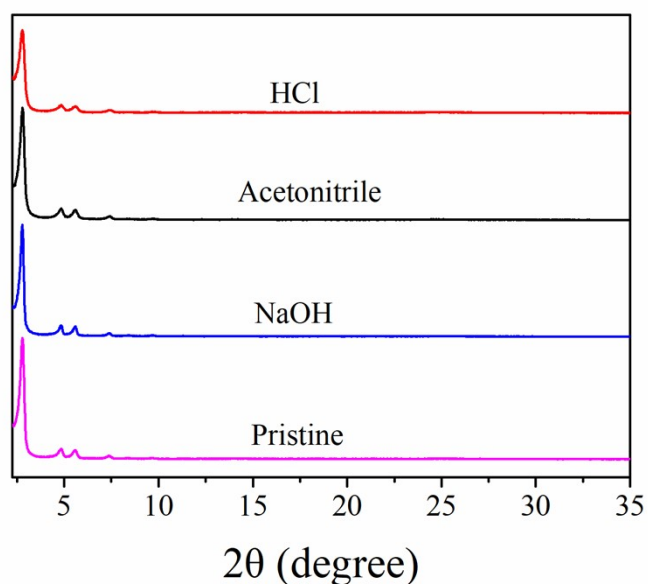

Figure S7. The PXRD patterns of chiral DA -TD COF after treatment in different solvents for three days.

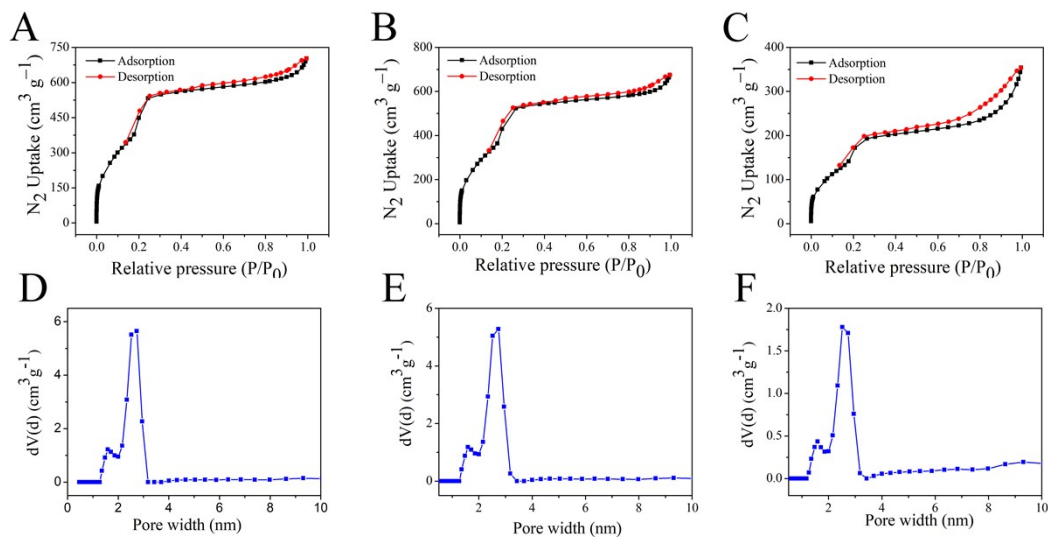

Figure S8. The  $N_2$  adsorption-desorption isotherms and pore-size distribution of chiral DA-TD COF upon treatment in acetonitrile (A and D), 1 M NaOH (B and E) and 1 M HCl (C and F) for three days.

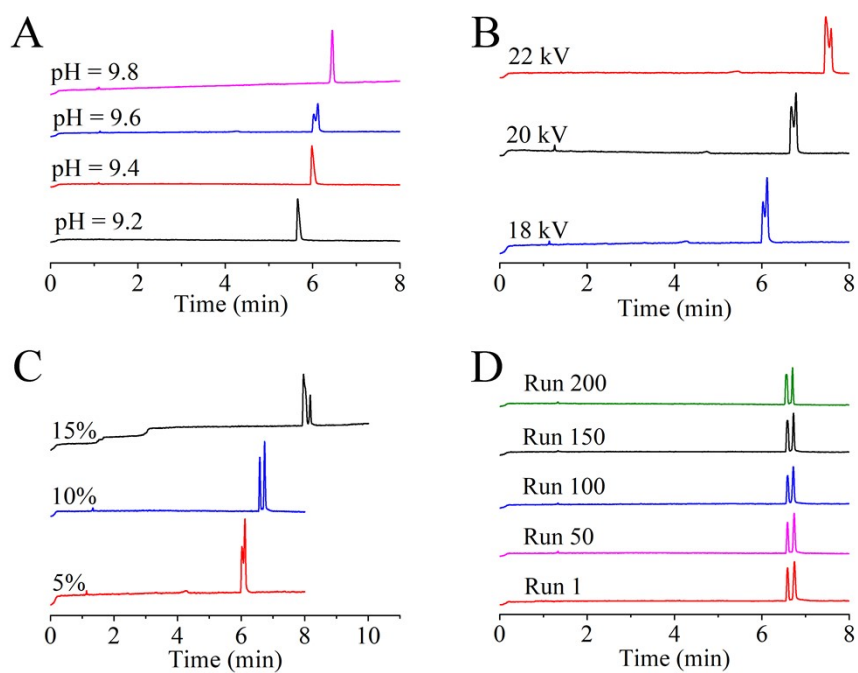

Figure S9. Effects of (A) pH, (B) voltage, (C) acetonitrile concentration on enantioseparation of terbutaline and (D) the reproducibility of 1 mg/mL chiral DA-TD COF coated capillary. Separation conditions: (A) 10 mM borate with different pH, (B) 10 mM borate (pH 9.6) with different voltage, (C) 10 mM borate (pH 9.6) with different acetonitrile concentration, (D) 10 mM borate (pH 9.6), 10% acetonitrile concentration, applied voltage: +20 kV. Detection wavelength: 214 nm; capillary: 75  $\mu\text{m}$  i.d., 40.2 cm total length (30 cm effective length); capillary temperature: 20  $^{\circ}\text{C}$ .

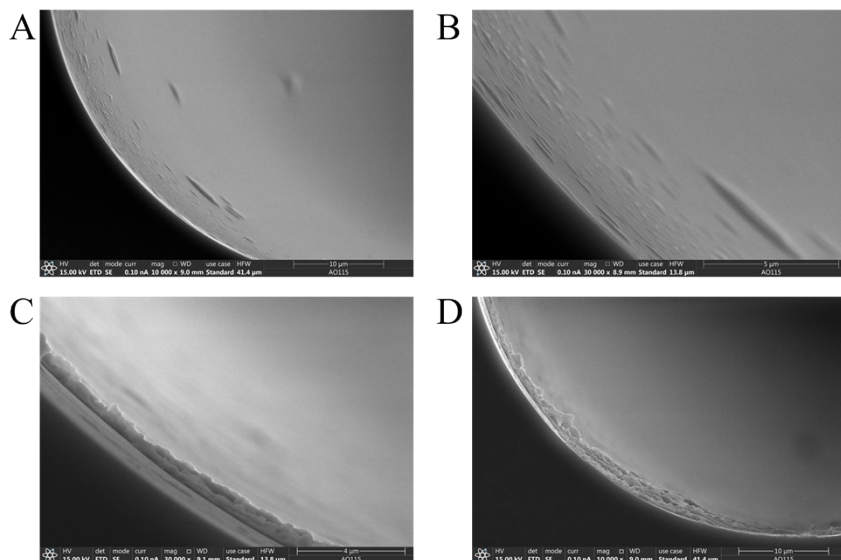

Figure S10. SEM images of the inner wall of 0.5 mg/mL chiral DA-TD COF coated capillary of 10, 000 (A), 30, 000 magnification (B) and 2 mg/mL chiral DA-TD COF coated capillary of 10, 000 (C), 30, 000 magnification (D).

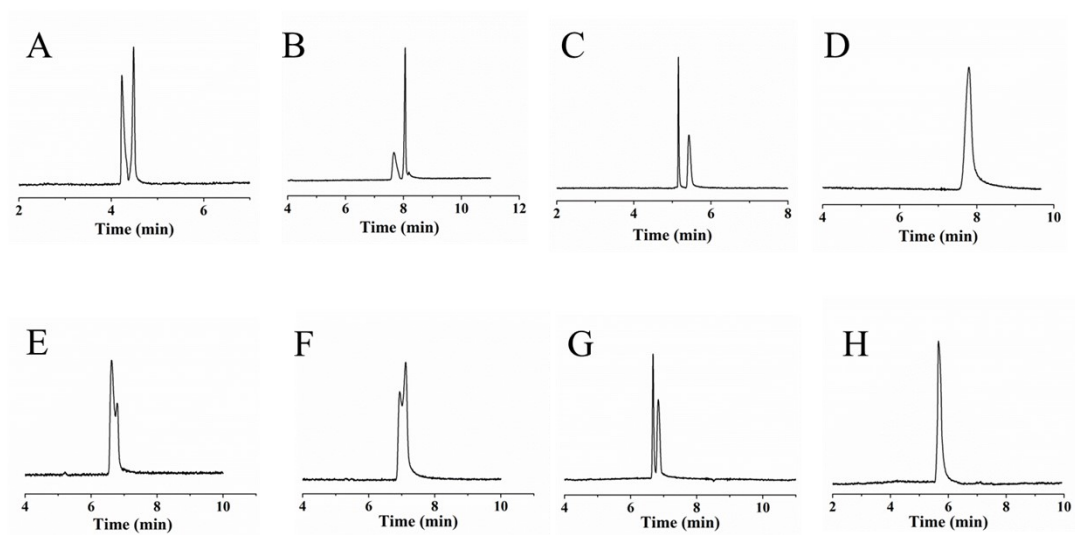

Figure S11. The electropherograms for enantioseparation of analytes under optimum conditions by 0.5 mg/mL chiral DA-TD COF coated capillary. A: terbutaline, B: verapamil, C: phenylephrine, D: norepinephrine, E: isoprenaline, F: epinephrine, G: propranolol, H: carvedilol. The separation conditions were same as Figure 3.

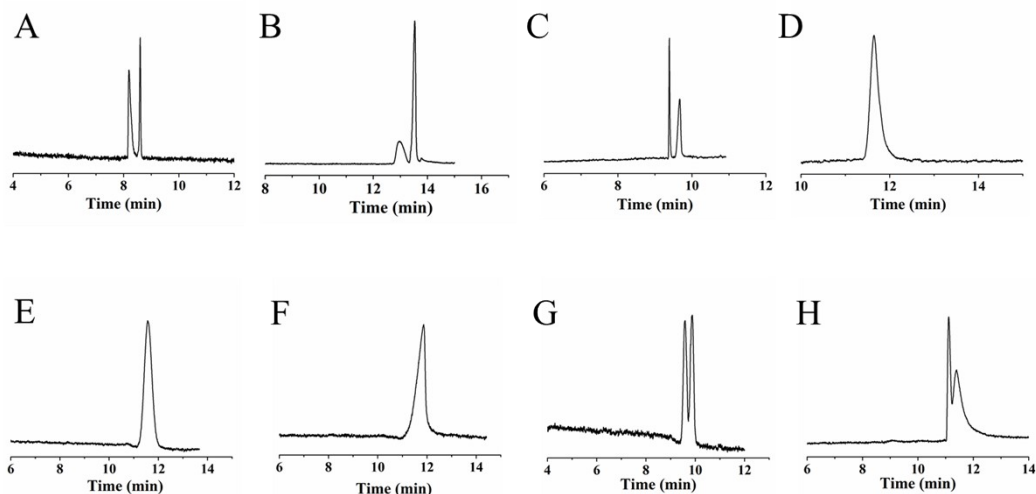

Figure S12. The electropherograms for enantioseparation of analytes under optimum conditions by 2 mg/mL chiral DA-TD COF coated capillary. A: terbutaline, B: verapamil, C: phenylephrine, D: norepinephrine, E: isoprenaline, F: epinephrine, G: propranolol, H: carvedilol. The separation conditions were same as Figure 3.

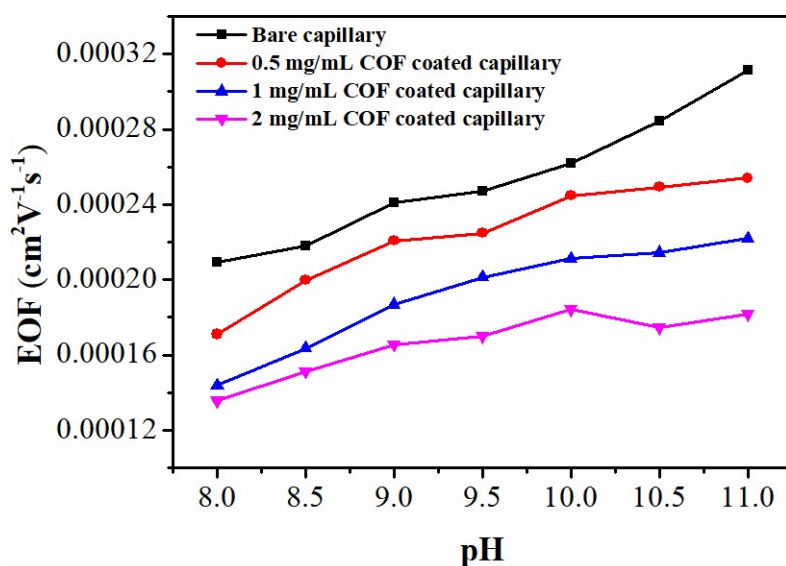

Figure S13. Effect of pH on the EOF in acetonitrile-sodium borate (10 mM sodium borate, 10% acetonitrile) for bare, 0.5 mg/mL chiral DA-TD COF, 1 mg/mL chiral DA-TD COF and 2 mg/mL chiral DA-TD COF coated capillary. The separation conditions were same as Figure 3.



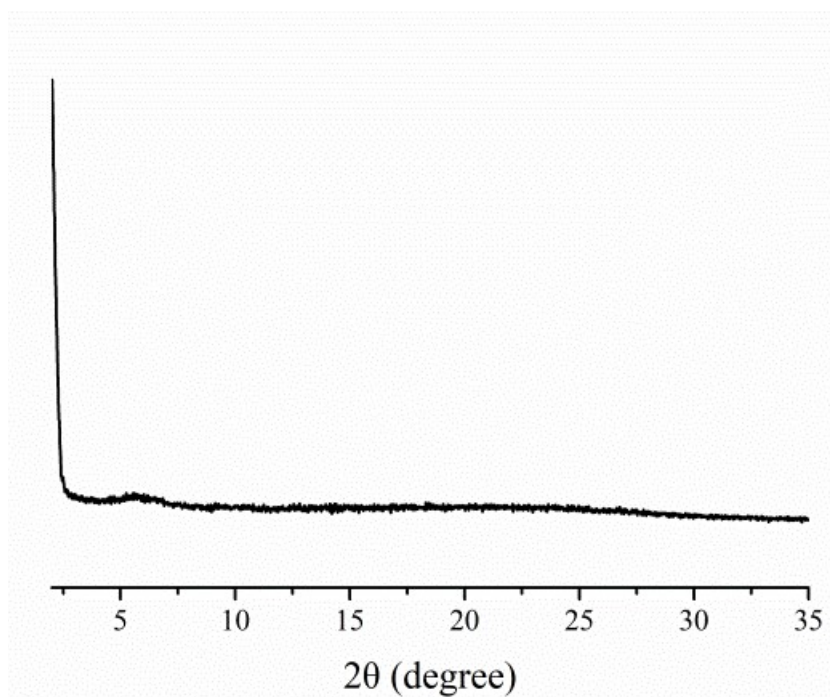

Figure S14. The PXR D pattern of amorphous DA-TD.

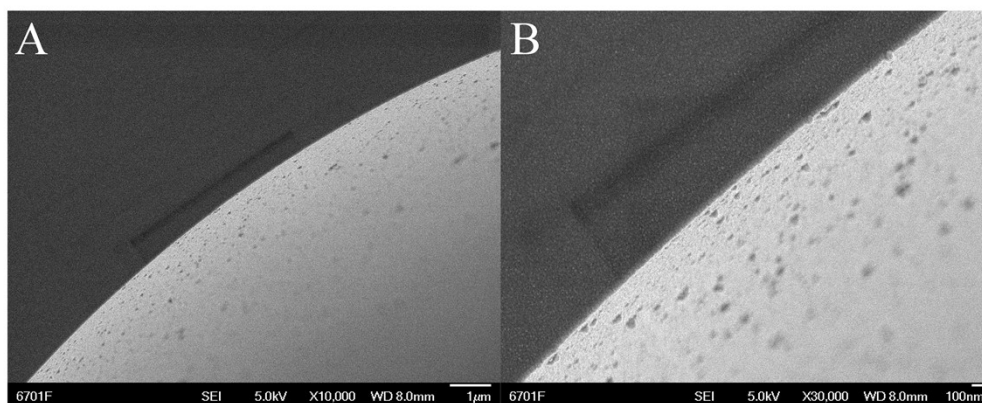

Figure S15. SEM images of the inner wall of amorphous DA-TD coated capillary of 10, 000 (A) and 30, 000 magnification (B).

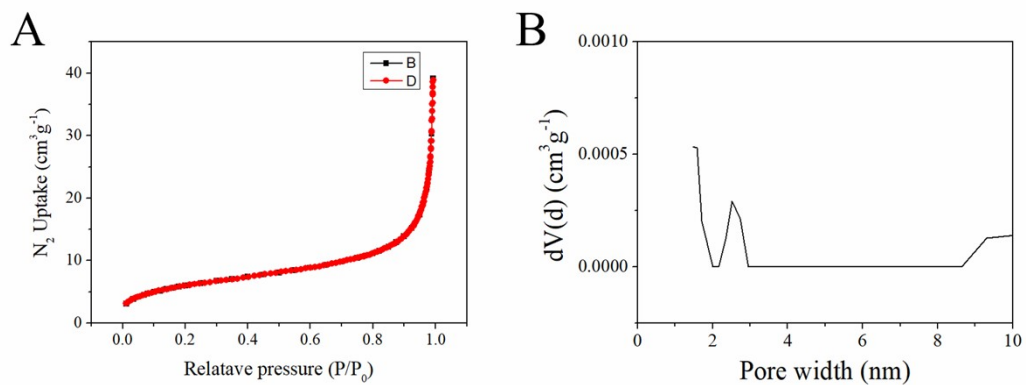

Figure S16. The  $N_2$  adsorption-desorption isotherms and pore-size distribution of amorphous DA-TD.

### The Experimental Details of Stimulation Method and Unit Cell Parameters

Crystallize structure of chiral DA-TD COF was generated using the Accelrys Materials Studio 7.0 software package. The model was constructed in the initial lattice with the space group of P1. The proposed model was geometry optimized using the MS Forcite molecular dynamics module (Universal force fields, Ewald summations) to obtain the optimized lattice parameters. Pawley refinement was applied to define the lattice parameters by Reflex module, producing the refined PXRD profiles. The simulated PXRD pattern of AA stacking was the best agreement with the experimental pattern of chiral DA-TD COF.

Table S1. Fractional atomic coordinates and parameter for the unit cell of chiral DA-TD COF with AA stacking mode.

| Space group: P1                            |         |         |          |
|--------------------------------------------|---------|---------|----------|
| A=36.44, b=35.81, c=4.38                   |         |         |          |
| $\alpha=88.78, \beta=93.99, \gamma=117.85$ |         |         |          |
| Rwp=5.23%, Rp=3.96%                        |         |         |          |
| O1                                         | 0.06062 | 0.47659 | -0.17646 |
| O2                                         | 0.95507 | 0.53832 | 0.04771  |
| C3                                         | 0.24933 | 0.62334 | 0.05951  |
| C4                                         | 0.38045 | 0.76165 | 0.10459  |
| C5                                         | 0.63256 | 0.2509  | -0.10516 |
| C6                                         | 0.76452 | 0.38861 | -0.07109 |
| C7                                         | 0.41352 | 0.78297 | -0.07212 |
| C8                                         | 0.43487 | 0.82591 | -0.06966 |
| C9                                         | 0.42305 | 0.8486  | 0.1064   |
| C10                                        | 0.39063 | 0.82749 | 0.28536  |
| C11                                        | 0.37008 | 0.78463 | 0.28832  |
| C12                                        | 0.22561 | 0.63167 | 0.24373  |
| C13                                        | 0.18319 | 0.60847 | 0.21743  |
| C14                                        | 0.16358 | 0.57527 | 0.01223  |
| C15                                        | 0.18717 | 0.56542 | -0.15961 |
| C16                                        | 0.22949 | 0.58941 | -0.13962 |
| C17                                        | 0.78686 | 0.37956 | -0.26389 |
| C18                                        | 0.82927 | 0.40245 | -0.25098 |
| C19                                        | 0.85025 | 0.43618 | -0.05148 |
| C20                                        | 0.82798 | 0.44676 | 0.12884  |
| C21                                        | 0.78569 | 0.42306 | 0.12226  |
| C22                                        | 0.59934 | 0.22934 | 0.06987  |
| C23                                        | 0.57772 | 0.18641 | 0.06244  |

|     |         |         |          |
|-----|---------|---------|----------|
| C24 | 0.58944 | 0.16391 | -0.1166  |
| C25 | 0.62192 | 0.18525 | -0.29468 |
| C26 | 0.64267 | 0.22813 | -0.29333 |
| N27 | 0.12014 | 0.55017 | -0.02399 |
| N28 | 0.44251 | 0.89272 | 0.11046  |
| N29 | 0.56984 | 0.11977 | -0.12417 |
| N30 | 0.89377 | 0.46099 | -0.02831 |
| C31 | 0.0934  | 0.55911 | 0.06689  |
| C32 | 0.47167 | 0.91779 | -0.04819 |
| C33 | 0.91968 | 0.45213 | -0.13578 |
| C34 | 0.5407  | 0.09459 | 0.03423  |
| C35 | 0.48863 | 0.96297 | -0.0212  |
| C36 | 0.04912 | 0.53068 | 0.01172  |
| C37 | 0.5236  | 0.04942 | 0.00519  |
| C38 | 0.96405 | 0.48021 | -0.08715 |
| C39 | 0.02247 | 0.54531 | 0.07463  |
| C40 | 0.03321 | 0.49041 | -0.10812 |
| C41 | 0.52323 | 0.98799 | -0.17292 |
| C42 | 0.47089 | 0.98116 | 0.14507  |
| C43 | 0.99055 | 0.46555 | -0.15339 |
| C44 | 0.98027 | 0.52071 | 0.02482  |
| C45 | 0.48897 | 0.02439 | 0.15656  |
| C46 | 0.5413  | 0.03124 | -0.16146 |
| H47 | 0.42233 | 0.76646 | -0.21936 |
| H48 | 0.4598  | 0.84064 | -0.21074 |
| H49 | 0.38145 | 0.84441 | 0.42569  |
| H50 | 0.34606 | 0.76952 | 0.43415  |
| H51 | 0.2398  | 0.65531 | 0.41526  |
| H52 | 0.16629 | 0.61589 | 0.36554  |
| H53 | 0.17257 | 0.5397  | -0.31653 |
| H54 | 0.24659 | 0.58192 | -0.28605 |
| H55 | 0.77157 | 0.35558 | -0.43194 |
| H56 | 0.84502 | 0.39434 | -0.40495 |
| H57 | 0.84364 | 0.47287 | 0.28186  |
| H58 | 0.76969 | 0.43118 | 0.27477  |
| H59 | 0.59066 | 0.24562 | 0.22024  |
| H60 | 0.55271 | 0.17154 | 0.20269  |
| H61 | 0.631   | 0.16851 | -0.43763 |
| H62 | 0.66668 | 0.24343 | -0.43923 |
| H63 | 0.10298 | 0.58851 | 0.17427  |
| H64 | 0.4844  | 0.90629 | -0.20416 |
| H65 | 0.90945 | 0.42298 | -0.24882 |
| H66 | 0.52815 | 0.106   | 0.19228  |

|      |         |         |          |
|------|---------|---------|----------|
| H67  | 0.03462 | 0.57674 | 0.15307  |
| H68  | 0.5359  | 0.97318 | -0.30022 |
| O69  | 0.43559 | 0.95531 | 0.29162  |
| H70  | 0.9774  | 0.43446 | -0.24024 |
| H71  | 0.4763  | 0.0392  | 0.28391  |
| O72  | 0.57659 | 0.05709 | -0.3081  |
| C73  | 0.29455 | 0.64906 | 0.07545  |
| C74  | 0.31806 | 0.62936 | 0.05919  |
| C75  | 0.36045 | 0.65175 | 0.06266  |
| C76  | 0.37968 | 0.69465 | 0.08025  |
| C77  | 0.3574  | 0.71572 | 0.09415  |
| C78  | 0.31422 | 0.6926  | 0.0954   |
| C79  | 0.3848  | 0.63033 | 0.04809  |
| C80  | 0.37478 | 0.59438 | 0.20904  |
| C81  | 0.39785 | 0.57436 | 0.19676  |
| C82  | 0.43163 | 0.5901  | 0.02287  |
| C83  | 0.44143 | 0.6258  | -0.13827 |
| C84  | 0.41833 | 0.64575 | -0.12657 |
| O85  | 0.29109 | 0.71172 | 0.15036  |
| C86  | 0.284   | 0.73349 | -0.09024 |
| C87  | 0.26248 | 0.75606 | 0.02413  |
| C88  | 0.26513 | 0.79009 | -0.18957 |
| C89  | 0.21808 | 0.72526 | 0.07789  |
| C90  | 0.25915 | 0.8228  | -0.03478 |
| N91  | 0.45666 | 0.57108 | 0.00008  |
| C92  | 0.45378 | 0.53905 | 0.14024  |
| C93  | 0.48207 | 0.52309 | 0.08941  |
| C94  | 0.47655 | 0.48642 | 0.2231   |
| C95  | 0.50407 | 0.47206 | 0.17258  |
| C96  | 0.53632 | 0.49334 | -0.0106  |
| C97  | 0.54191 | 0.53009 | -0.14327 |
| C98  | 0.5144  | 0.54442 | -0.09292 |
| O99  | 0.44357 | 0.46572 | 0.40357  |
| C100 | 0.43372 | 0.42555 | 0.50312  |
| C101 | 0.71933 | 0.36317 | -0.07385 |
| C102 | 0.69629 | 0.3832  | -0.04793 |
| C103 | 0.65396 | 0.36116 | -0.04377 |
| C104 | 0.63429 | 0.31827 | -0.06525 |
| C105 | 0.65609 | 0.29682 | -0.08826 |
| C106 | 0.69925 | 0.31959 | -0.09376 |
| C107 | 0.63015 | 0.38299 | -0.01881 |
| C108 | 0.6402  | 0.41932 | -0.1748  |
| C109 | 0.61772 | 0.43979 | -0.1525  |

|      |         |         |          |
|------|---------|---------|----------|
| C110 | 0.58453 | 0.42421 | 0.02718  |
| C111 | 0.57458 | 0.38804 | 0.18245  |
| C112 | 0.5971  | 0.36761 | 0.16072  |
| O113 | 0.72196 | 0.30011 | -0.15206 |
| C114 | 0.72868 | 0.27768 | 0.08554  |
| C115 | 0.75023 | 0.25531 | -0.03155 |
| C116 | 0.74773 | 0.22119 | 0.18052  |
| C117 | 0.7946  | 0.28626 | -0.08512 |
| C118 | 0.75405 | 0.18879 | 0.02437  |
| N119 | 0.56005 | 0.44367 | 0.05937  |
| C120 | 0.56437 | 0.4772  | -0.06497 |
| O121 | 0.57486 | 0.55081 | -0.32411 |
| C122 | 0.58473 | 0.59099 | -0.42329 |
| H123 | 0.30319 | 0.59614 | 0.04476  |
| H124 | 0.4126  | 0.71182 | 0.09252  |
| H125 | 0.34951 | 0.58211 | 0.34938  |
| H126 | 0.38896 | 0.54694 | 0.32505  |
| H127 | 0.46702 | 0.63806 | -0.27566 |
| H128 | 0.42634 | 0.6729  | -0.25813 |
| H129 | 0.26538 | 0.71207 | -0.27712 |
| H130 | 0.31326 | 0.75642 | -0.17104 |
| H131 | 0.27889 | 0.77096 | 0.24003  |
| H132 | 0.24191 | 0.77648 | -0.38005 |
| H133 | 0.29561 | 0.80613 | -0.27948 |
| H134 | 0.21697 | 0.70351 | 0.25285  |
| H135 | 0.20146 | 0.70762 | -0.13015 |
| H136 | 0.20201 | 0.74114 | 0.15624  |
| H137 | 0.2282  | 0.80946 | 0.04454  |
| H138 | 0.26302 | 0.84723 | -0.19509 |
| H139 | 0.28209 | 0.83704 | 0.15706  |
| H140 | 0.43081 | 0.52358 | 0.29583  |
| H141 | 0.50056 | 0.44415 | 0.2742   |
| H142 | 0.51795 | 0.57237 | -0.19419 |
| H143 | 0.45881 | 0.4265  | 0.65412  |
| H144 | 0.42675 | 0.40439 | 0.30983  |
| H145 | 0.40631 | 0.4136  | 0.63089  |
| H146 | 0.71147 | 0.41642 | -0.03265 |
| H147 | 0.60139 | 0.30146 | -0.07385 |
| H148 | 0.665   | 0.43151 | -0.31949 |
| H149 | 0.62653 | 0.46734 | -0.279   |
| H150 | 0.54937 | 0.37578 | 0.32337  |
| H151 | 0.58905 | 0.34013 | 0.28834  |
| H152 | 0.69931 | 0.2546  | 0.16398  |

|      |         |         |          |
|------|---------|---------|----------|
| H153 | 0.74718 | 0.2986  | 0.27484  |
| H154 | 0.7338  | 0.24057 | -0.24784 |
| H155 | 0.7172  | 0.2049  | 0.26961  |
| H156 | 0.77083 | 0.23474 | 0.3717   |
| H157 | 0.79564 | 0.30818 | -0.2585  |
| H158 | 0.81072 | 0.27055 | -0.16548 |
| H159 | 0.81123 | 0.30373 | 0.12352  |
| H160 | 0.7313  | 0.1747  | -0.16876 |
| H161 | 0.75013 | 0.16421 | 0.18329  |
| H162 | 0.78511 | 0.20238 | -0.05326 |
| H163 | 0.58834 | 0.49381 | -0.21101 |
| H164 | 0.55963 | 0.59007 | -0.57408 |
| H165 | 0.61213 | 0.60294 | -0.55119 |
| H166 | 0.59173 | 0.61213 | -0.22983 |
| C167 | 0.41404 | 0.97286 | 0.42291  |
| C168 | 0.0452  | 0.438   | -0.32887 |
| C169 | 0.95191 | 0.54862 | 0.34401  |
| C170 | 0.59818 | 0.03956 | -0.43901 |
| H171 | 0.38663 | 0.94785 | 0.51667  |
| H172 | 0.404   | 0.98859 | 0.25199  |
| H173 | 0.43305 | 0.99441 | 0.60842  |
| H174 | 0.02883 | 0.43776 | -0.54539 |
| H175 | 0.02512 | 0.4125  | -0.18726 |
| H176 | 0.07115 | 0.4333  | -0.37543 |
| H177 | 0.93674 | 0.52022 | 0.47361  |
| H178 | 0.93274 | 0.56372 | 0.33671  |
| H179 | 0.9822  | 0.57016 | 0.45421  |
| H180 | 0.62559 | 0.06457 | -0.53269 |
| H181 | 0.5792  | 0.01798 | -0.62449 |
| H182 | 0.60821 | 0.02385 | -0.26782 |

Table S2. Fractional atomic coordinates and parameter for the unit cell of chiral DA-TD COF with AB stacking mode.

|                                            |         |         |          |
|--------------------------------------------|---------|---------|----------|
| Space group: P1                            |         |         |          |
| A=35.69, b=35.06, c=4.29                   |         |         |          |
| $\alpha=88.73, \beta=94.05, \gamma=117.96$ |         |         |          |
| Rwp=5.85%, Rp=4.64%                        |         |         |          |
| O1                                         | 0.06195 | 0.48687 | -0.09166 |
| O2                                         | 0.97607 | 0.5518  | 0.02644  |
| C3                                         | 0.25481 | 0.63714 | 0.02921  |
| C4                                         | 0.38882 | 0.77868 | 0.0523   |

|     |         |         |          |
|-----|---------|---------|----------|
| C5  | 0.64647 | 0.25757 | -0.05201 |
| C6  | 0.78133 | 0.3985  | -0.03454 |
| C7  | 0.42261 | 0.80052 | -0.03796 |
| C8  | 0.44443 | 0.84442 | -0.03677 |
| C9  | 0.43235 | 0.86757 | 0.05309  |
| C10 | 0.39922 | 0.84594 | 0.14451  |
| C11 | 0.37822 | 0.80212 | 0.14609  |
| C12 | 0.23057 | 0.6456  | 0.12325  |
| C13 | 0.18722 | 0.62182 | 0.10971  |
| C14 | 0.16718 | 0.58787 | 0.00486  |
| C15 | 0.19129 | 0.57786 | -0.08284 |
| C16 | 0.23454 | 0.60245 | -0.07253 |
| C17 | 0.80416 | 0.3893  | -0.13297 |
| C18 | 0.8475  | 0.41277 | -0.12627 |
| C19 | 0.86894 | 0.44726 | -0.02433 |
| C20 | 0.84619 | 0.45802 | 0.06771  |
| C21 | 0.80297 | 0.43372 | 0.06425  |
| C22 | 0.61252 | 0.23549 | 0.03739  |
| C23 | 0.59042 | 0.1916  | 0.03366  |
| C24 | 0.6024  | 0.16864 | -0.05773 |
| C25 | 0.63559 | 0.1905  | -0.14869 |
| C26 | 0.6568  | 0.23434 | -0.14807 |
| N27 | 0.12278 | 0.56214 | -0.01374 |
| N28 | 0.45224 | 0.91267 | 0.05509  |
| N29 | 0.58237 | 0.12352 | -0.06152 |
| N30 | 0.91342 | 0.47269 | -0.0124  |
| C31 | 0.09545 | 0.57122 | 0.03256  |
| C32 | 0.48204 | 0.93833 | -0.02597 |
| C33 | 0.9399  | 0.4637  | -0.06719 |
| C34 | 0.55259 | 0.09774 | 0.01942  |
| C35 | 0.49937 | 0.98451 | -0.01227 |
| C36 | 0.0502  | 0.54209 | 0.00428  |
| C37 | 0.53511 | 0.05157 | 0.00466  |
| C38 | 0.98525 | 0.49247 | -0.04225 |
| C39 | 0.02296 | 0.55697 | 0.03627  |
| C40 | 0.03394 | 0.50093 | -0.05689 |
| C41 | 0.53473 | 1.01014 | -0.08976 |
| C42 | 0.48124 | 1.00305 | 0.07258  |
| C43 | 1.01233 | 0.47755 | -0.07594 |
| C44 | 1.00182 | 0.53386 | 0.01491  |
| C45 | 0.49972 | 0.02594 | 0.08198  |
| C46 | 0.5532  | 0.03304 | -0.08038 |
| H47 | 0.43162 | 0.78368 | -0.11312 |



|     |         |         |          |
|-----|---------|---------|----------|
| H48 | 0.46991 | 0.85951 | -0.10883 |
| H49 | 0.38984 | 0.8632  | 0.21614  |
| H50 | 0.35367 | 0.78664 | 0.22059  |
| H51 | 0.24507 | 0.66977 | 0.2109   |
| H52 | 0.16995 | 0.62936 | 0.18532  |
| H53 | 0.17636 | 0.55156 | -0.16302 |
| H54 | 0.25201 | 0.59484 | -0.14728 |
| H55 | 0.78853 | 0.36478 | -0.21884 |
| H56 | 0.8636  | 0.40452 | -0.20488 |
| H57 | 0.86219 | 0.48472 | 0.14589  |
| H58 | 0.78661 | 0.44198 | 0.14211  |
| H59 | 0.60365 | 0.25209 | 0.11416  |
| H60 | 0.56486 | 0.17636 | 0.1053   |
| H61 | 0.64487 | 0.17343 | -0.22166 |
| H62 | 0.68134 | 0.25002 | -0.2226  |
| H63 | 0.10524 | 0.60126 | 0.08739  |
| H64 | 0.49505 | 0.92662 | -0.1056  |
| H65 | 0.92945 | 0.4339  | -0.12491 |
| H66 | 0.53976 | 0.10937 | 0.10011  |
| H67 | 0.03538 | 0.5891  | 0.07631  |
| H68 | 0.54768 | 0.99504 | -0.15473 |
| O69 | 0.44517 | 0.97658 | 0.14744  |
| H70 | 0.99889 | 0.44577 | -0.12028 |
| H71 | 0.48677 | 0.04104 | 0.14697  |
| O72 | 0.58927 | 0.05952 | -0.15528 |
| C73 | 0.30103 | 0.66351 | 0.03746  |
| C74 | 0.32505 | 0.64344 | 0.02931  |
| C75 | 0.36838 | 0.66639 | 0.03118  |
| C76 | 0.38803 | 0.71025 | 0.0401   |
| C77 | 0.36526 | 0.73172 | 0.04704  |
| C78 | 0.32113 | 0.70802 | 0.04758  |
| C79 | 0.39326 | 0.64457 | 0.02392  |
| C80 | 0.38302 | 0.60783 | 0.10627  |
| C81 | 0.4066  | 0.58743 | 0.10017  |
| C82 | 0.44112 | 0.60358 | 0.01137  |
| C83 | 0.45114 | 0.64006 | -0.07109 |
| C84 | 0.42753 | 0.66039 | -0.06528 |
| O85 | 0.29749 | 0.72749 | 0.07551  |
| C86 | 0.29024 | 0.74971 | -0.04758 |
| C87 | 0.26825 | 0.77272 | 0.0107   |
| C88 | 0.27096 | 0.80748 | -0.09864 |
| C89 | 0.22288 | 0.74117 | 0.03811  |
| C90 | 0.26485 | 0.84087 | -0.01966 |

|      |         |         |          |
|------|---------|---------|----------|
| N91  | 0.4667  | 0.58421 | -0.00011 |
| C92  | 0.46376 | 0.55149 | 0.07164  |
| C93  | 0.49267 | 0.53525 | 0.04583  |
| C94  | 0.48703 | 0.49778 | 0.11427  |
| C95  | 0.51515 | 0.48318 | 0.08862  |
| C96  | 0.54811 | 0.50498 | -0.00496 |
| C97  | 0.55383 | 0.54252 | -0.07288 |
| C98  | 0.52571 | 0.5571  | -0.04731 |
| O99  | 0.45332 | 0.47657 | 0.20646  |
| C100 | 0.44326 | 0.43553 | 0.25745  |
| C101 | 0.73515 | 0.37242 | -0.03605 |
| C102 | 0.7116  | 0.39283 | -0.02297 |
| C103 | 0.66834 | 0.37023 | -0.02094 |
| C104 | 0.64824 | 0.32638 | -0.03185 |
| C105 | 0.67052 | 0.30452 | -0.04344 |
| C106 | 0.71462 | 0.32787 | -0.04615 |
| C107 | 0.64401 | 0.39247 | -0.00836 |
| C108 | 0.65428 | 0.4296  | -0.08818 |
| C109 | 0.6313  | 0.45046 | -0.07695 |
| C110 | 0.59738 | 0.43448 | 0.01481  |
| C111 | 0.58721 | 0.39751 | 0.09426  |
| C112 | 0.61023 | 0.3767  | 0.08332  |
| O113 | 0.73783 | 0.30802 | -0.07579 |
| C114 | 0.7447  | 0.28513 | 0.04577  |
| C115 | 0.76673 | 0.26233 | -0.01391 |
| C116 | 0.76417 | 0.22747 | 0.0946   |
| C117 | 0.81207 | 0.29403 | -0.04122 |
| C118 | 0.77063 | 0.1944  | 0.01493  |
| N119 | 0.57236 | 0.4543  | 0.03109  |
| C120 | 0.57678 | 0.48855 | -0.03257 |
| O121 | 0.5875  | 0.56375 | -0.16525 |
| C122 | 0.59759 | 0.60481 | -0.21605 |
| H123 | 0.30986 | 0.60948 | 0.022    |
| H124 | 0.42167 | 0.72785 | 0.04645  |
| H125 | 0.35719 | 0.59525 | 0.17795  |
| H126 | 0.39751 | 0.55941 | 0.1658   |
| H127 | 0.47729 | 0.65263 | -0.14125 |
| H128 | 0.43571 | 0.68813 | -0.13259 |
| H129 | 0.27122 | 0.7278  | -0.14311 |
| H130 | 0.32015 | 0.77319 | -0.08884 |
| H131 | 0.28502 | 0.78797 | 0.12108  |
| H132 | 0.24723 | 0.79353 | -0.19605 |
| H133 | 0.30211 | 0.82392 | -0.14453 |

|      |         |         |          |
|------|---------|---------|----------|
| H134 | 0.22174 | 0.71895 | 0.12761  |
| H135 | 0.20589 | 0.72312 | -0.06824 |
| H136 | 0.20645 | 0.75735 | 0.07803  |
| H137 | 0.23322 | 0.82718 | 0.0208   |
| H138 | 0.2688  | 0.86583 | -0.10168 |
| H139 | 0.28829 | 0.85546 | 0.07844  |
| H140 | 0.44028 | 0.53564 | 0.15113  |
| H141 | 0.51157 | 0.45466 | 0.14065  |
| H142 | 0.52934 | 0.58565 | -0.09916 |
| H143 | 0.4689  | 0.43655 | 0.33473  |
| H144 | 0.43613 | 0.4139  | 0.15869  |
| H145 | 0.41524 | 0.42327 | 0.32268  |
| H146 | 0.72711 | 0.42679 | -0.01522 |
| H147 | 0.61461 | 0.30915 | -0.03632 |
| H148 | 0.67962 | 0.4421  | -0.16208 |
| H149 | 0.64031 | 0.47861 | -0.14168 |
| H150 | 0.56145 | 0.38494 | 0.16623  |
| H151 | 0.602   | 0.34861 | 0.14862  |
| H152 | 0.71469 | 0.26149 | 0.08582  |
| H153 | 0.76361 | 0.30653 | 0.14253  |
| H154 | 0.74993 | 0.24724 | -0.12448 |
| H155 | 0.73297 | 0.21077 | 0.14007  |
| H156 | 0.78778 | 0.24136 | 0.19237  |
| H157 | 0.81313 | 0.31642 | -0.12992 |
| H158 | 0.82855 | 0.27802 | -0.08217 |
| H159 | 0.82907 | 0.31191 | 0.06543  |
| H160 | 0.74738 | 0.17996 | -0.08383 |
| H161 | 0.76662 | 0.16929 | 0.09623  |
| H162 | 0.80237 | 0.20834 | -0.02467 |
| H163 | 0.60128 | 0.50557 | -0.10718 |
| H164 | 0.57193 | 0.60382 | -0.29323 |
| H165 | 0.62559 | 0.61707 | -0.28135 |
| H166 | 0.60474 | 0.62641 | -0.11721 |
| C167 | 0.42314 | 0.99446 | 0.21439  |
| C168 | 0.04619 | 0.44743 | -0.16949 |
| C169 | 0.97284 | 0.56231 | 0.17784  |
| C170 | 0.61133 | 0.04166 | -0.22204 |
| H171 | 0.39513 | 0.96885 | 0.26229  |
| H172 | 0.41288 | 1.0105  | 0.12693  |
| H173 | 0.44257 | 1.0165  | 0.30922  |
| H174 | 0.02946 | 0.44715 | -0.28023 |
| H175 | 0.02567 | 0.42134 | -0.0971  |
| H176 | 0.07271 | 0.44268 | -0.19316 |

|      |          |         |          |
|------|----------|---------|----------|
| H177 | 0.95734  | 0.53327 | 0.24412  |
| H178 | 0.95325  | 0.57769 | 0.17397  |
| H179 | 1.0038   | 0.58437 | 0.23422  |
| H180 | 0.63935  | 0.06726 | -0.2699  |
| H181 | 0.59194  | 0.01958 | -0.31685 |
| H182 | 0.62158  | 0.02564 | -0.13444 |
| O183 | -0.61374 | 1.16857 | 0.1592   |
| O184 | 0.30038  | 1.2335  | 0.2773   |
| C185 | -0.42088 | 1.31884 | 0.28007  |
| C186 | -0.28688 | 1.46038 | 0.30316  |
| C187 | -0.02922 | 0.93928 | 0.19885  |
| C188 | 0.10564  | 1.0802  | 0.21632  |
| C189 | -0.25308 | 1.48222 | 0.2129   |
| C190 | -0.23126 | 1.52612 | 0.21409  |
| C191 | -0.24334 | 1.54927 | 0.30395  |
| C192 | -0.27647 | 1.52764 | 0.39537  |
| C193 | -0.29747 | 1.48382 | 0.39695  |
| C194 | -0.44512 | 1.3273  | 0.3741   |
| C195 | -0.48847 | 1.30352 | 0.36057  |
| C196 | -0.50851 | 1.26957 | 0.25572  |
| C197 | -0.4844  | 1.25956 | 0.16802  |
| C198 | -0.44115 | 1.28415 | 0.17833  |
| C199 | 0.12847  | 1.071   | 0.11789  |
| C200 | 0.17181  | 1.09447 | 0.12459  |
| C201 | 0.19325  | 1.12896 | 0.22653  |
| C202 | 0.17049  | 1.13972 | 0.31856  |
| C203 | 0.12728  | 1.11542 | 0.31511  |
| C204 | -0.06317 | 0.91719 | 0.28825  |
| C205 | -0.08527 | 0.8733  | 0.28452  |
| C206 | -0.07329 | 0.85034 | 0.19313  |
| C207 | -0.0401  | 0.8722  | 0.10217  |
| C208 | -0.01889 | 0.91604 | 0.10279  |
| N209 | -0.55291 | 1.24384 | 0.23711  |
| N210 | -0.22345 | 1.59437 | 0.30595  |
| N211 | -0.09332 | 0.80522 | 0.18934  |
| N212 | 0.23773  | 1.15439 | 0.23846  |
| C213 | -0.58024 | 1.25292 | 0.28342  |
| C214 | -0.19365 | 1.62003 | 0.22489  |
| C215 | 0.26421  | 1.1454  | 0.18367  |
| C216 | -0.1231  | 0.77944 | 0.27027  |
| C217 | -0.17632 | 1.66621 | 0.23859  |
| C218 | -0.62549 | 1.22379 | 0.25514  |
| C219 | -0.14058 | 0.73327 | 0.25552  |

|      |          |         |         |
|------|----------|---------|---------|
| C220 | 0.30956  | 1.17417 | 0.20861 |
| C221 | -0.65273 | 1.23867 | 0.28713 |
| C222 | -0.64175 | 1.18263 | 0.19396 |
| C223 | -0.14096 | 1.69184 | 0.16109 |
| C224 | -0.19445 | 1.68475 | 0.32344 |
| C225 | 0.33664  | 1.15925 | 0.17492 |
| C226 | 0.32613  | 1.21556 | 0.26576 |
| C227 | -0.17597 | 0.70764 | 0.33284 |
| C228 | -0.12249 | 0.71474 | 0.17048 |
| H229 | -0.24407 | 1.46538 | 0.13773 |
| H230 | -0.20578 | 1.54122 | 0.14203 |
| H231 | -0.28585 | 1.5449  | 0.467   |
| H232 | -0.32202 | 1.46834 | 0.47144 |
| H233 | -0.43062 | 1.35147 | 0.46176 |
| H234 | -0.50574 | 1.31106 | 0.43618 |
| H235 | -0.49933 | 1.23326 | 0.08784 |
| H236 | -0.42368 | 1.27654 | 0.10358 |
| H237 | 0.11284  | 1.04648 | 0.03202 |
| H238 | 0.18791  | 1.08622 | 0.04598 |
| H239 | 0.1865   | 1.16642 | 0.39675 |
| H240 | 0.11092  | 1.12368 | 0.39297 |
| H241 | -0.07204 | 0.93379 | 0.36502 |
| H242 | -0.11083 | 0.85806 | 0.35615 |
| H243 | -0.03082 | 0.85513 | 0.0292  |
| H244 | 0.00565  | 0.93172 | 0.02826 |
| H245 | -0.57045 | 1.28296 | 0.33824 |
| H246 | -0.18064 | 1.60832 | 0.14526 |
| H247 | 0.25376  | 1.1156  | 0.12595 |
| H248 | -0.13593 | 0.79107 | 0.35097 |
| H249 | -0.64031 | 1.2708  | 0.32716 |
| H250 | -0.12801 | 1.67674 | 0.09613 |
| O251 | -0.23052 | 1.65828 | 0.39829 |
| H252 | 0.3232   | 1.12747 | 0.13058 |
| H253 | -0.18892 | 0.72274 | 0.39783 |
| O254 | -0.08642 | 0.74122 | 0.09558 |
| C255 | -0.37466 | 1.34521 | 0.28831 |
| C256 | -0.35064 | 1.32514 | 0.28017 |
| C257 | -0.30731 | 1.34809 | 0.28204 |
| C258 | -0.28766 | 1.39195 | 0.29096 |
| C259 | -0.31043 | 1.41342 | 0.2979  |
| C260 | -0.35456 | 1.38972 | 0.29844 |
| C261 | -0.28243 | 1.32627 | 0.27477 |
| C262 | -0.29267 | 1.28953 | 0.35713 |

|      |          |         |         |
|------|----------|---------|---------|
| C263 | -0.26909 | 1.26913 | 0.35102 |
| C264 | -0.23457 | 1.28528 | 0.26222 |
| C265 | -0.22455 | 1.32176 | 0.17977 |
| C266 | -0.24816 | 1.34209 | 0.18558 |
| O267 | -0.3782  | 1.40919 | 0.32636 |
| C268 | -0.38545 | 1.43141 | 0.20327 |
| C269 | -0.40744 | 1.45442 | 0.26156 |
| C270 | -0.40473 | 1.48918 | 0.15222 |
| C271 | -0.45282 | 1.42287 | 0.28897 |
| C272 | -0.41084 | 1.52257 | 0.2312  |
| N273 | -0.20899 | 1.26591 | 0.25075 |
| C274 | -0.21193 | 1.23319 | 0.32249 |
| C275 | -0.18302 | 1.21695 | 0.29669 |
| C276 | -0.18866 | 1.17948 | 0.36513 |
| C277 | -0.16054 | 1.16488 | 0.33948 |
| C278 | -0.12758 | 1.18668 | 0.2459  |
| C279 | -0.12187 | 1.22422 | 0.17798 |
| C280 | -0.14998 | 1.2388  | 0.20355 |
| O281 | -0.22237 | 1.15827 | 0.45732 |
| C282 | -0.23243 | 1.11723 | 0.5083  |
| C283 | 0.05946  | 1.05412 | 0.21481 |
| C284 | 0.03591  | 1.07453 | 0.22789 |
| C285 | -0.00735 | 1.05193 | 0.22992 |
| C286 | -0.02745 | 1.00808 | 0.21901 |
| C287 | -0.00517 | 0.98622 | 0.20742 |
| C288 | 0.03893  | 1.00957 | 0.2047  |
| C289 | -0.03168 | 1.07417 | 0.2425  |
| C290 | -0.02141 | 1.1113  | 0.16267 |
| C291 | -0.04439 | 1.13216 | 0.1739  |
| C292 | -0.07831 | 1.11618 | 0.26566 |
| C293 | -0.08848 | 1.07921 | 0.34512 |
| C294 | -0.06546 | 1.0584  | 0.33418 |
| O295 | 0.06214  | 0.98972 | 0.17507 |
| C296 | 0.06901  | 0.96683 | 0.29663 |
| C297 | 0.09104  | 0.94403 | 0.23695 |
| C298 | 0.08848  | 0.90917 | 0.34546 |
| C299 | 0.13638  | 0.97573 | 0.20964 |
| C300 | 0.09494  | 0.8761  | 0.26579 |
| N301 | -0.10333 | 1.136   | 0.28195 |
| C302 | -0.09891 | 1.17025 | 0.21829 |
| O303 | -0.08819 | 1.24545 | 0.08561 |
| C304 | -0.0781  | 1.28651 | 0.03481 |
| H305 | -0.36583 | 1.29118 | 0.27285 |

|      |          |         |          |
|------|----------|---------|----------|
| H306 | -0.25402 | 1.40955 | 0.29731  |
| H307 | -0.3185  | 1.27695 | 0.4288   |
| H308 | -0.27818 | 1.24111 | 0.41666  |
| H309 | -0.1984  | 1.33433 | 0.10961  |
| H310 | -0.23998 | 1.36983 | 0.11827  |
| H311 | -0.40448 | 1.4095  | 0.10775  |
| H312 | -0.35554 | 1.45489 | 0.16201  |
| H313 | -0.39067 | 1.46967 | 0.37193  |
| H314 | -0.42846 | 1.47523 | 0.05481  |
| H315 | -0.37358 | 1.50562 | 0.10633  |
| H316 | -0.45395 | 1.40065 | 0.37847  |
| H317 | -0.4698  | 1.40482 | 0.18262  |
| H318 | -0.46924 | 1.43905 | 0.32889  |
| H319 | -0.44247 | 1.50888 | 0.27166  |
| H320 | -0.40689 | 1.54753 | 0.14918  |
| H321 | -0.3874  | 1.53716 | 0.3293   |
| H322 | -0.23541 | 1.21734 | 0.40198  |
| H323 | -0.16412 | 1.13636 | 0.3915   |
| H324 | -0.14635 | 1.26735 | 0.1517   |
| H325 | -0.20679 | 1.11825 | 0.58559  |
| H326 | -0.23956 | 1.0956  | 0.40955  |
| H327 | -0.26045 | 1.10497 | 0.57354  |
| H328 | 0.05142  | 1.10849 | 0.23564  |
| H329 | -0.06108 | 0.99085 | 0.21454  |
| H330 | 0.00393  | 1.1238  | 0.08878  |
| H331 | -0.03538 | 1.16031 | 0.10918  |
| H332 | -0.11424 | 1.06664 | 0.41709  |
| H333 | -0.07369 | 1.03031 | 0.39948  |
| H334 | 0.039    | 0.94319 | 0.33668  |
| H335 | 0.08792  | 0.98823 | 0.39339  |
| H336 | 0.07424  | 0.92894 | 0.12638  |
| H337 | 0.05728  | 0.89247 | 0.39093  |
| H338 | 0.11209  | 0.92306 | 0.44323  |
| H339 | 0.13744  | 0.99812 | 0.12094  |
| H340 | 0.15286  | 0.95972 | 0.16869  |
| H341 | 0.15338  | 0.99361 | 0.31629  |
| H342 | 0.07169  | 0.86166 | 0.16702  |
| H343 | 0.09093  | 0.85099 | 0.34709  |
| H344 | 0.12668  | 0.89004 | 0.22619  |
| H345 | -0.07441 | 1.18727 | 0.14368  |
| H346 | -0.10376 | 1.28552 | -0.04237 |
| H347 | -0.0501  | 1.29877 | -0.0305  |
| H348 | -0.07095 | 1.30811 | 0.13365  |

|      |          |         |          |
|------|----------|---------|----------|
| C349 | -0.25255 | 1.67616 | 0.46525  |
| C350 | -0.6295  | 1.12913 | 0.08137  |
| C351 | 0.29715  | 1.24401 | 0.4287   |
| C352 | -0.06436 | 0.72336 | 0.02882  |
| H353 | -0.28056 | 1.65056 | 0.51315  |
| H354 | -0.26281 | 1.6922  | 0.37779  |
| H355 | -0.23312 | 1.6982  | 0.56007  |
| H356 | -0.64623 | 1.12885 | -0.02937 |
| H357 | -0.65002 | 1.10304 | 0.15376  |
| H358 | -0.60298 | 1.12438 | 0.05769  |
| H359 | 0.28165  | 1.21497 | 0.49498  |
| H360 | 0.27756  | 1.25939 | 0.42483  |
| H361 | 0.32811  | 1.26607 | 0.48508  |
| H362 | -0.03635 | 0.74896 | -0.01904 |
| H363 | -0.08376 | 0.70128 | -0.06599 |
| H364 | -0.05411 | 0.70734 | 0.11642  |



Table S3. The optimum separation pH, acetonitrile concentration, resolution and theoretical plate numbers for the model chiral analytes.

| Analyte        | pH    | Acetonitrile<br>concentration<br>(%) | <i>Rs</i> | TN (n/m) <sup>a</sup> |                |
|----------------|-------|--------------------------------------|-----------|-----------------------|----------------|
|                |       |                                      |           | N <sub>1</sub>        | N <sub>2</sub> |
| Terbutaline    | 9.60  | 10                                   | 2.53      | 169726                | 147403         |
| Verapamil      | 9.10  | 0                                    | 4.13      | 58927                 | 19796          |
| Phenylephrine  | 9.85  | 15                                   | 2.35      | 10202                 | 11531          |
| Norepinephrine | 9.52  | 0                                    | 1.02      | 20526                 | 18160          |
| Isoprenaline   | 9.55  | 0                                    | 1.63      | 87624                 | 74885          |
| Epinephrine    | 9.33  | 0                                    | 1.66      | 42184                 | 139526         |
| Propranolol    | 10.95 | 20                                   | 1.27      | 87302                 | 35709          |
| Carvedilol     | 9.50  | 20                                   | 1.27      | 82516                 | 38454          |

a: the theoretical plate numbers.



## References

1. Y. Numata, K. Inoue, N. Baranov, M. Kurmoo and K. Kikuchi, *J. Am. Chem. Soc.*, 2007, **129**, 9902-9909.
2. J. Park, D. Feng and H. C. Zhou, *J. Am. Chem. Soc.*, 2015, **137**, 1663-1672.
3. C. Kang, Z. Zhang, V. Wee, A. K. Usadi, D. C. Calabro, L. S. Baugh, S. Wang, Y. Wang and D. Zhao, *J. Am. Chem. Soc.*, 2020, **142**, 12995-13002.
